# Supplementary material for: Pleasure in decision-making situations
Source: Springer Nature journal article supplement (doi:10.1186/1471-244x-2-7), 2002-05-29
Supplement: Additional file 1 [file 1471-244x-2-7-s1.doc]

**Experiment 1. Example, from Questionnaire I, of items to be rated as pleasurable or displeasurable (the same situation is presented from two points of view, patient and surgeon, and various outcomes)**

7. You are a patient and the surgeon describes to you your situation: you suffer from a disease which may, with 15% chance, cause permanent damage to your brain. The surgeon proposes a simple operation and garanties 100% cure of the disease. However the operation itself, although simple, may, with 20% chance, cause permanent lesions to your brain. You accept the surgery.

11. You are a neurosurgeon and a patient fully trusts you to decide what is best for him: the patient suffers from a disease which may, with 15% chance, cause permanent damage to his brain. You can perform a simple operation with 100% certainty of success. However, the operation, although simple, may, with 20% chance, cause permanent lesions to his brain. You recommend the surgery.

17. You are a neurosurgeon and a patient fully trusts you to decide what is best for him: the patient suffers from a disease which may, with 20% chance, cause permanent damage to his brain. You can perform a simple operation with 100% certainty of success. However, the operation, although simple, may, with 15% chance, cause permanent lesions to his brain. You do not recommend the surgery.

22. You are a patient and the surgeon describes to you your situation: you suffer from a disease which may, with 15% chance, cause permanent damage to your brain. The surgeon proposes a simple operation and garanties 100% cure of the disease. However, the operation, although simple, may, with 20% chance, cause permanent lesions to your brain. You refuse the surgery.

26. You are a patient and the surgeon describes to you your situation: you suffer from a disease which may, with 20% chance, cause permanent damage to your brain. The surgeon proposes a simple operation and garanties 100% cure of the disease. However, the operation, although simple, may, with 15% chance, cause permanent lesions to your brain. You accept the surgery.

31 You are a neurosurgeon and a patient fully trusts you to decide what is best for him: the patient suffers from a disease which may, with 15% chance, cause permanent damage to his brain. You can perform a simple operation with 100% certainty of success. However, the operation, although simple, may, with 20% chance, cause permanent lesions to his brain. You do not recommend the surgery.

1. You are a neurosurgeon and a patient fully trusts you to decide what is best for him: the patient suffers from a disease which may, with 20% chance, cause permanent damage to his brain. You can perform a simple operation with 100% certainty of success. However, the operation, although simple, may, with 15% chance, cause permanent lesions to his brain. You recommend the surgery.

**Experiment 2. Examples (from Questionnaire II) of items to be rated as pleasurable or displeasurable (each situation returns four times with different behaviors each time)**

23. My child cries every night. I check on the baby each time.

73. My child cries every night. I give the baby a sleeping pill.

123. My child cries every night. I ignore the crying to teach the baby how to behave.

173. My child cries every night. I let my spouse take care of the baby.

35. A friend offers me the subjects for an exam scheduled tomorrow. I don't listen to him.

85. A friend offers me the subjects for an exam scheduled tomorrow. I ask him to show them to me and I prepare the answers.

135. A friend offers me the subjects for an exam scheduled tomorrow. I read them because I am curious, but I do not especially prepare the answers.

185. A friend offers me the subjects for an exam scheduled tomorrow. I denounce him.

43. I am a man travelling in an overcrowded bus. I must offer my seat to any woman.

93. I am a man travelling in an overcrowded bus. I must offer my seat to elder women.

143. I am a man travelling in an overcrowded bus. I must offer my seat to a woman if she is pregnant or carries a child.

193. I am a man travelling in an overcrowded bus. I must keep my seat because men have the same rights as women.

47. One of my colleagues is depressed and talks about suicide. I am moralizing her and say that it is a sin to commit suicide.

97. One of my colleagues is depressed and talks of suicide. I talk with her and encourage her to regard life more positively.

147. One of my colleagues is depressed and talks of suicide. I tell her to consult a psychologist.

197. One of my colleagues is depressed and talks of suicide. I say nothing because I consider this as none of my business.

**Experiment 3. Example of one sentence as presented under separate items in Questionnaire V, and as a multiple choice in Questionnaire VI.**

in Questionnaire V In Questionnaire VI

## *Problem n° 5, If n=4x2-7x+2, and x=2, then:*

Item 5: If n=4x2-7x+2, and x=2, then n=2 A) n=2

Item 55: If n=4x2-7x+2, and x=2, then n=4 B) n=4

Item 105: If n=4x2-7x+2, and x=2, then n=6 C) n=6

Item 155: If n=4x2-7x+2, and x=2, then n= -8 D) n=-8

in Questionnaire V

Item 4: The length of a field is 4/3 its breadth. Its perimeter is 560 m. The dimensions of this field are: L=380 m, B=180 m

Item 54: Item 4: The length of a field is 4/3 its breadth. Its perimeter is 560 m. The dimensions of this field are: L=380 m, B=2400 m

Item 104: The length of a field is 4/3 its breadth. Its perimeter is 560 m. The dimensions of this field are: L=210 m, B=70 m

Item 154: The length of a field is 4/3 its breadth. Its perimeter is 560 m. The dimensions of this field are: L=160 m, B=120 m

In Questionnaire VI

## 4/ The length of a field is 4/3 its breadth. Its perimeter is 560 m. The dimensions of this field are:

A) L=380 m, B=180 m

B) L=380 m, B=2400 m

C) L=210 m, B=70 m

D) L=160 m, B=120 m
